# Supplementary material for: Ethylene glycol-assisted coating of titania on nanoparticles
Source: Royal Society of Chemistry journal article supplement (doi:10.1039/c5dt04361a), 2015-12-08
Supplement: c5dt04361a1.pdf [file c5dt04361a1.pdf]

### Supporting Information

#### Ethylene Glycol-Assisted Coating of Titania on Nanoparticles

Michael Dahl, Fernando Castaneda, Ji Bong Joo, Victor Reyes, James Goebel, and Yadong Yin\*

Department of Chemistry, University of California, Riverside, CA 92521 (USA)

\*E-mail: yadong.yin@ucr.edu

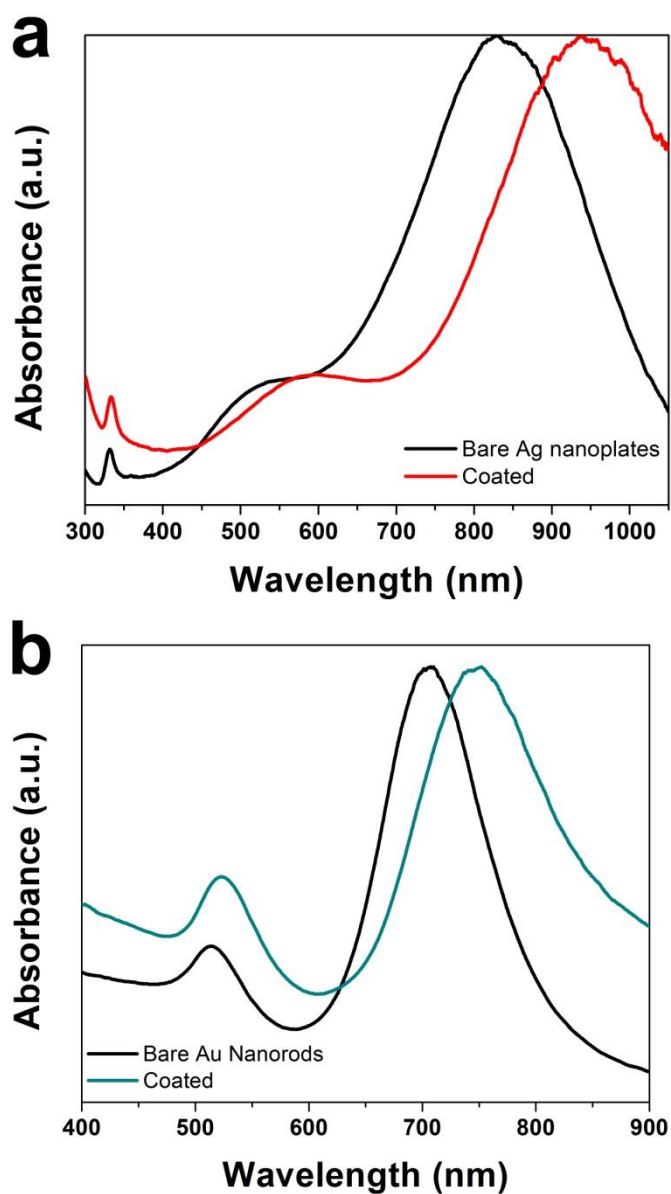

**Figure S1.** UV-Vis absorption spectra of (a) silver nanoplates and (b) gold nanorods before and after coating with titanium glycolate.

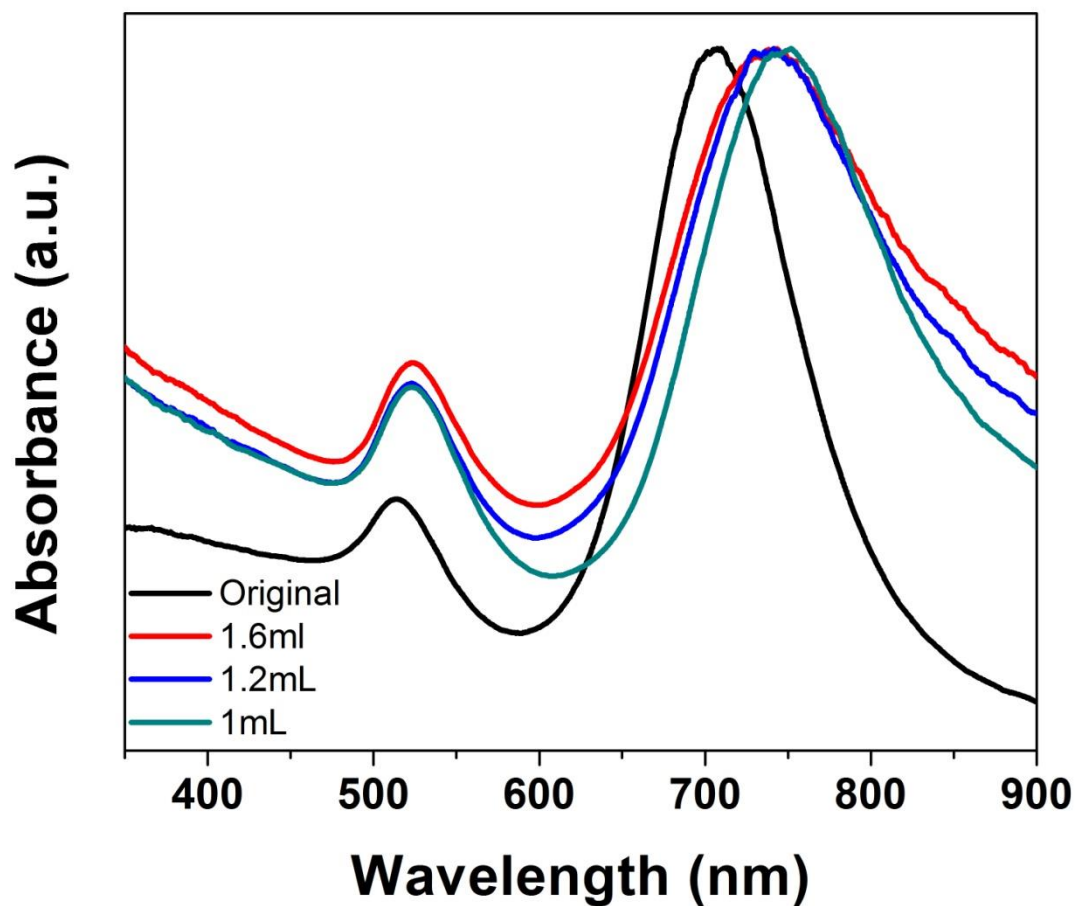

**Figure S2.** UV-Vis absorption spectra of gold nanorods indicating peak position changes after coating with different thicknesses of titanium glycolate.

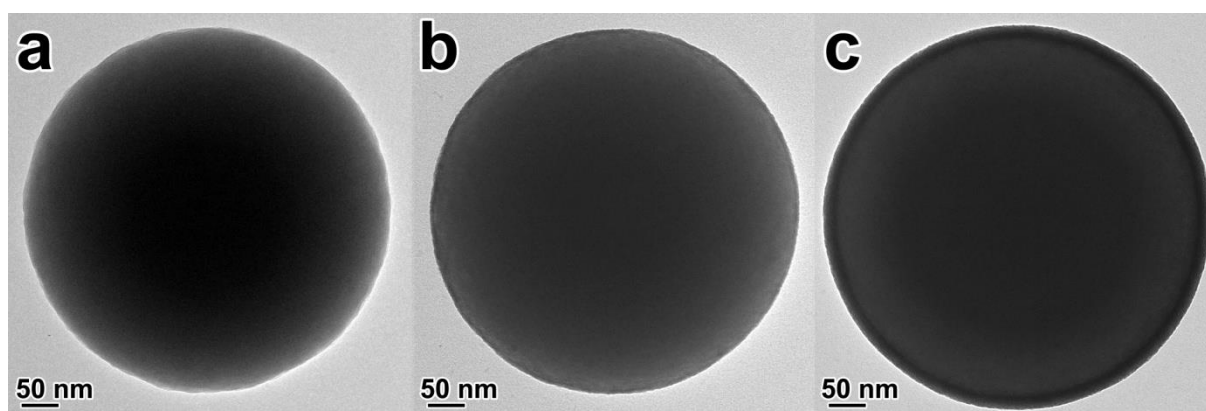

**Figure S3.** TEM images of resorcinol-formaldehyde polymer sphere (a) before coating (b) after a single coating and (c) after four coatings with titanium glycolate precursor.

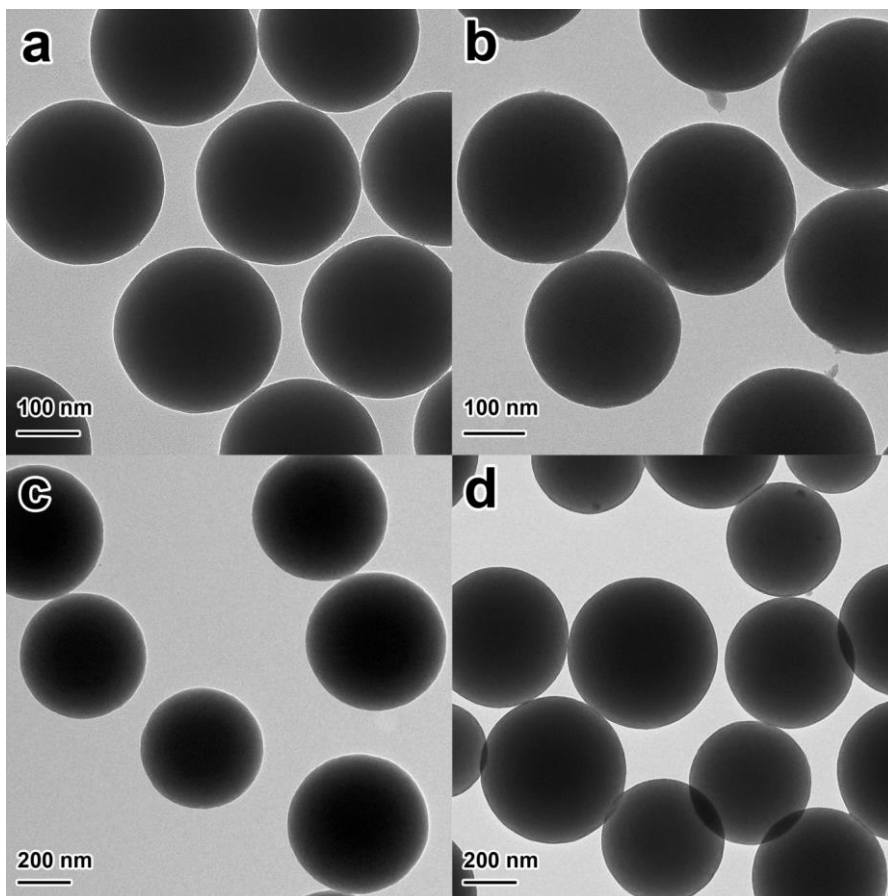

**Figure S4.** TEM images of SiO<sub>2</sub> and RF polymer microspheres before (a,c) and after (b,d) coating with titanium glycolate.

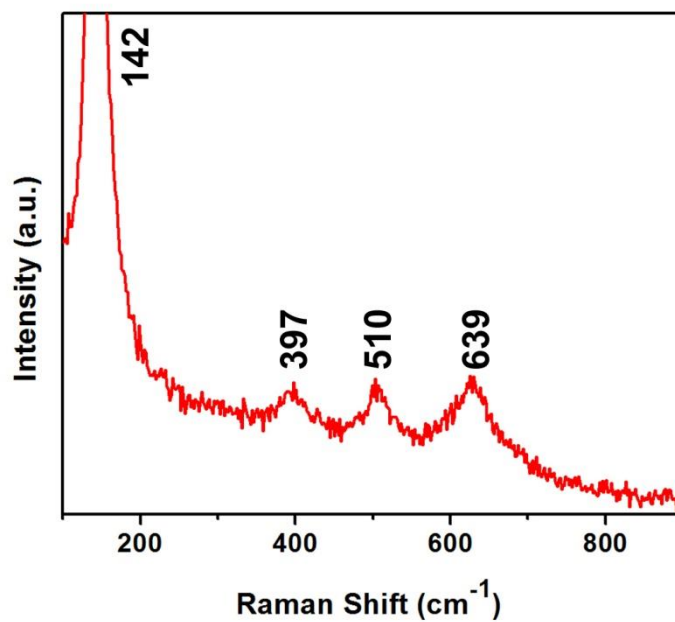

**Figure S5.** Enlarged Raman spectra of titanium glycolate coatings on gold nanorods after refluxing, indicating anatase crystal phase.  $\lambda_{\text{ex}} = 532 \text{ nm}$ .

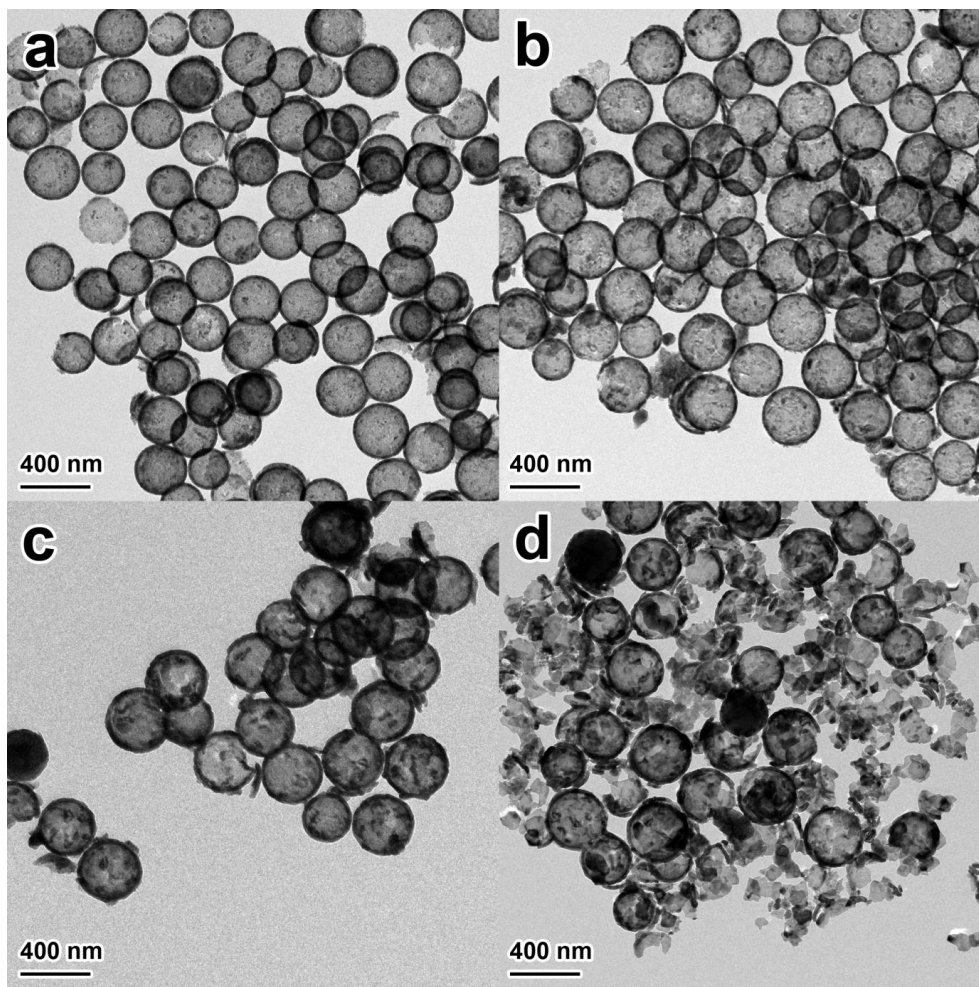

**Figure S6.** Low magnification TEM images of hollow  $\text{TiO}_2$  shells obtained by calcination of  $\text{SiO}_2$ @titanium glycolate, followed by etching. Samples shown were calcined at (a) 400, (b) 600, (c) 800. and (d) 900  $^\circ\text{C}$ .

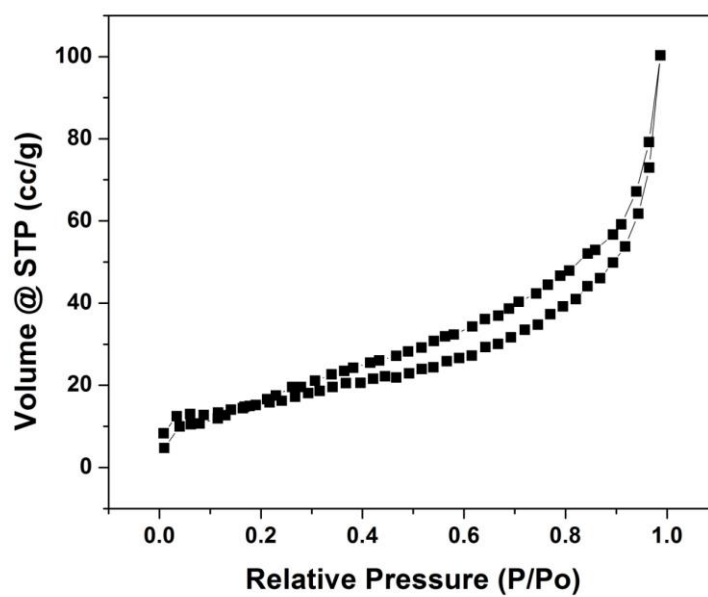

**Figure S7.**  $\text{N}_2$  physisorption isotherm for hollow  $\text{TiO}_2$  sample calcined at 700  $^\circ\text{C}$ .
